# Supplementary material
Source: PubMed Central journal article supplement (PMC3541039)
Supplement: NIHMS421572-supplement-ESI.pdf [file NIHMS421572-supplement-ESI.pdf]

Electronic Supplementary Information for

## Electrochemical direct detection of DNA deamination catalyzed by APOBEC3G

Junya Chiba,<sup>\*a</sup> Takahide Kouno,<sup>\*b</sup> Shun Aoki,<sup>a</sup> Hitoshi Sato,<sup>a</sup> JingYing Zhang,<sup>b</sup> Hiroshi Matsuo<sup>b</sup> and Masahiko Inouye<sup>a</sup>

<sup>a</sup> Graduate School of Pharmaceutical Sciences, University of Toyama, Sugitani 2630, Toyama 930-0194, Japan.

<sup>b</sup> Department of Biochemistry, Molecular Biology & Biophysics, University of Minnesota, 1-130 Nils Hasselmo Hall, Minneapolis, MN 55455, USA.

### Materials and Methods

#### Preparation of A3G protein and nucleotides

The A3G CTD, spanning residues 193-384, was expressed in BL21 (DE3) (Agilent Technologies) and purified as described previously.<sup>s1</sup> Additionally, the protein was purified by gel chromatography using a Superdex 75 column (GE Healthcare) with a running buffer (50 mM sodium phosphate, pH 7.3, 100 mM NaCl, 0.005% Tween 20, 1 mM DTT). The purity of A3G CTD protein was confirmed by SDS-PAGE, and the protein concentration was estimated according to the absorbance at 280 nm and the theoretical value of molar extinction coefficient ( $\epsilon = 40,450$ ). Single-strand DNAs, 15-mer nucleotides 15-CCC (5'-GGATTCCCAATTGAG-3'), 15-CCU (5'-GGATTCCdUAATTGAG-3'), and 15-CUU (5'-GGATTCCdUdUAATTGAG-3') were synthesized and purified by HPLC (Integrated DNA technologies).

#### Preparation of DNA probes and immobilization of the DNA probes onto gold electrodes

DNA probes Fc-GGG (5'-Fc-CTCAATTGGGAATCC-(CH<sub>2</sub>)<sub>3</sub>-SH-3'), Fc-GGA (5'-Fc-CTCAATTAGGAATCC-(CH<sub>2</sub>)<sub>3</sub>-SH-3'), Fc-GAA (5'-Fc-CTCAATTAAGAATCC-(CH<sub>2</sub>)<sub>3</sub>-SH-3'), Fc-GAG (5'-Fc-CTCAATTGAGAATCC-(CH<sub>2</sub>)<sub>3</sub>-SH-3'), Fc-AGG (5'-Fc-CTCAATTGGAAATCC-(CH<sub>2</sub>)<sub>3</sub>-SH-3'), Fc-AAA (5'-Fc-CTCAATTAAAAATCC-(CH<sub>2</sub>)<sub>3</sub>-SH-3'), and Fc-AGA (5'-Fc-CTCAATTAGAAATCC-(CH<sub>2</sub>)<sub>3</sub>-SH-3') were synthesized according to a procedure previously reported.<sup>s2,s3</sup> Commercially available gold electrodes (Tanaka Kikinzoku, Tokyo, Japan) were cleaned as a reported procedure<sup>s2,s3</sup> and dried under argon stream before use. For immobilization of DNA probes, 1  $\mu$ L of a probe DNA (100  $\mu$ M) in a buffer solution (10 mM phosphate buffer that contained 1 M NaClO<sub>4</sub>, pH 7.0) was placed on the gold electrode and kept in a closed container under high humidity for 90 min at room temperature. After having been rinsed with the buffer solution (300  $\mu$ L), the probe DNA-modified gold electrode was soaked in a solution of 1 mM

6-mercaptohexan-1-ol in the buffer solution contained 1% Tween 20 (300  $\mu$ L) for 90 min at room temperature. Then, it was thoroughly washed with Milli-Q water and the buffer solution successively. For hybridization of target DNAs, 5  $\mu$ L of a target DNA (10  $\mu$ M) in the buffer solution was placed on the probe-modified gold electrode and kept in a closed container under high humidity for 90 min at room temperature, then it was rinsed with the buffer solution (300  $\mu$ L).

### **Deamination reaction**

The deamination reaction was performed in a buffer (50mM sodium phosphate, pH7.3, 100mM NaCl, 0.005% Tween 20, 1mM DTT) at 20°C with 10  $\mu$ M A3G CTD and 10  $\mu$ M substrate nucleotide, 15-CCC. After incubation for 30 min to 24 hours, 60  $\mu$ l of the reaction mixture was mixed with 6  $\mu$ l of phenol/chloroform/isoamyl alcohol (25:24:1) to terminate the reaction, and then centrifuged at 18,000 x g for 2 min. 50  $\mu$ l of the supernatant was applied to a centri-spin 10 column (Princeton separations) to remove buffer salts. The elute was lyophilized and stored at -30°C for further analysis.

### **Electrochemical measurements**

Square-wave voltammetry (SWV) measurements was carried out as previously reported.<sup>s2</sup> The buffer solution (10 mM phosphate buffer that contained 1 M NaClO<sub>4</sub>, pH 7.0) was used as the electrolyte solution for all electrochemical studies. SWV measurement was carried out at 25 °C on the probe-modified electrodes by means of a normal three-electrode configuration consisting of the gold working electrode, a saturated Ag/AgCl reference electrode, and a platinum wire auxiliary electrode. The working compartment of the electrochemical cell was separated from the reference compartment by a glass frit.

**Table S1.** Optimized frequency for each voltammetry measurement

| Probe  | Optimized frequency (Hz) | Complementary hybrid | Mismatched hybrid | Normalized Peak Current Ratio [mismatched] / [complementary] |
|--------|--------------------------|----------------------|-------------------|--------------------------------------------------------------|
| Fc-GGG | <b>40</b>                | CCC                  | CCU               | $0.10 \pm 0.07$                                              |
| Fc-GGA | <b>90</b>                | CCU                  | CCC               | $0.23 \pm 0.19$                                              |
| Fc-GAA | <b>100</b>               | CUU                  | CCU               | $0.05 \pm 0.02$                                              |
| Fc-AGG | <b>60</b>                | UCC                  | CCC               | $0.13 \pm 0.04$                                              |
| Fc-GAG | <b>140</b>               | CUC                  | CCC               | $0.32 \pm 0.06$                                              |
| Fc-AAA | <b>110</b>               | UUU                  | CUU               | $0.04 \pm 0.01$                                              |
| Fc-AGA | <b>120</b>               | UCU                  | CCU               | $0.20 \pm 0.15$                                              |

**References for ESI**

s1 K. M. Chen, E. Harjes, P. J. Gross, A. Fahmy, Y. Lu, K. Shindo, R. S. Harris and H. Matsuo, *Nature*, 2008, **452**, 116.

s2 (a) R. Ikeda, S. Kobayashi, J. Chiba and M. Inouye, *Chem. Eur. J.* 2009, **15**, 4822. (b) R. Ikeda, S. Kitagawa, J. Chiba and M. Inouye, *Chem. Eur. J.* 2009, **15**, 7048. (c) J. Chiba, A. Akaishi, R. Ikeda and M. Inouye, *Chem. Commun.*, 2010, **46**, 7563.

s3 (a) M. Inouye, R. Ikeda, M. Takase, T. Tsuru and J. Chiba, *Proc. Natl. Acad. Sci. U.S.A.*, 2005, **102**, 11606. (b) R. Ikeda, J. Chiba and M. Inouye, *e-J. Surf. Sci. Nanotechnol.*, 2005, **3**, 393. (c) R. Ikeda, A. Akaishi, J. Chiba and M. Inouye, *ChemBioChem*, 2007, **8**, 2219.
